# Supplementary material for: Empowering Adsorption and Photocatalytic Degradation of Ciprofloxacin on BiOI Composites: A Material-by-Design Investigation
Source: PubMed Central journal article supplement (PMC10666137; doi:10.1021/acsomega.3c06243), 2023-11-06

**Empowering adsorption and photocatalytic degradation of ciprofloxacin**

**on BiOI composites:**

**A materials-by-design investigation**

Sepideh G. Khasevani<sup>a</sup>, Dariush Nikjoo<sup>a</sup>, Cécile Chaxel<sup>a</sup>, Kentaro Umeki<sup>a</sup>, Shokat Sarmad<sup>b</sup>,  
Jyri-Pekka Mikkola<sup>b, c</sup>, Isabella Concina<sup>a\*</sup>

<sup>a</sup>Luleå University of Technology, Department of Engineering Sciences and Mathematics,  
98187 Luleå, Sweden

<sup>b</sup>Wallenberg Wood Science Center, Department of Chemistry Technical Chemistry,  
Department of Chemistry, Chemical-Biological Centre, Umeå University, SE-90871 Umeå,  
Sweden

<sup>c</sup>Industrial Chemistry & Reaction Engineering, Johan Gadolin Process Chemistry Centre,  
Åbo Akademi University, FI-20500 Åbo-Turku, Finland

*\* Corresponding author: [isabella.concina@ltu.se](mailto:isabella.concina@ltu.se)*

Supplementary Information

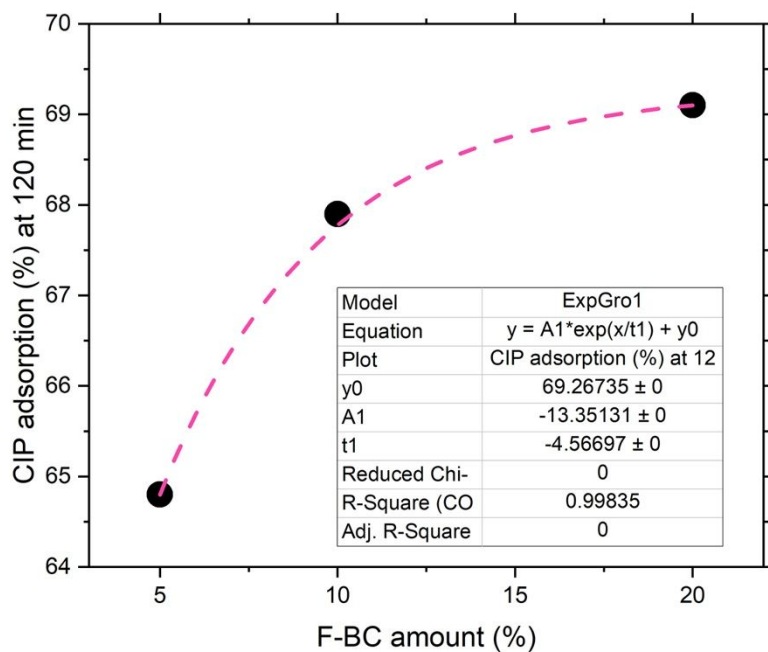

Figure S 1. CIP adsorption under dark vs. F-BC content for the ternary composites.

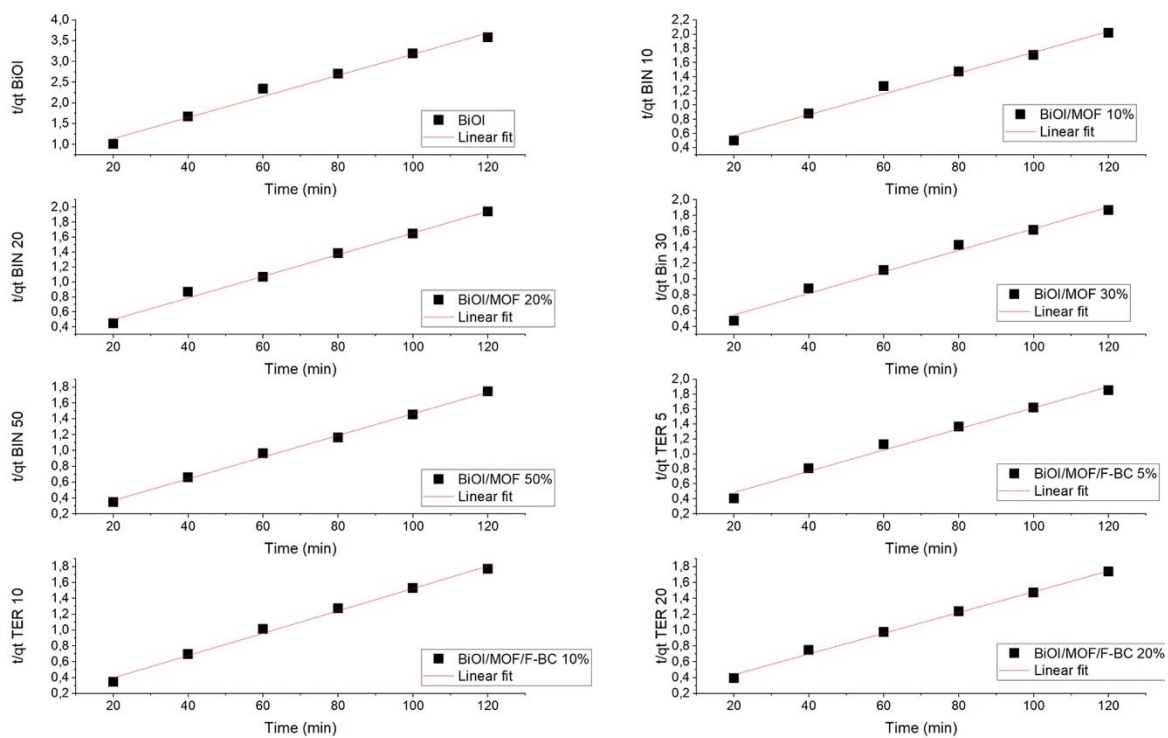

Figure S 2. Fitting according to a pseudo-second order model of the absorption process supported by the materials under investigation. Markers are experimental points, lines are fitting equations. Integrated equation:  $q_t = \frac{q_e^2 k_2 t}{1 + q_e k_2 t}$ .

| Material          | R <sup>2</sup> | Slope (g mg <sup>-1</sup> ) | Intercept (g mg <sup>-1</sup> min) |
|-------------------|----------------|-----------------------------|------------------------------------|
| BiOI              | 0.98599        | 0.02544 ± 0.00152           | 1.022                              |
| BiOI/MOF 10%      | 0.98690        | 0.01467 ± 0.06582           | 0.7698                             |
| BiOI/MOF 20%      | 0.99337        | 0.01446 ± 0.00059146        | 0.9936                             |
| BiOI/MOF 30%      | 0.98821        | 0.0136 ± 0.00074292         | 0.6739                             |
| BiOI/MOF 50%      | 0.99700        | 0.01368 ± 0.00037544        | 1.938                              |
| BiOI/MOF/F-BC 5%  | 0.98787        | 0.01415 ± 0.00078370        | 0.9787                             |
| BiOI/MOF/F-BC 10% | 0.99944        | 0.0141 ± 0.00053052         | 1.721                              |
| BiOI/MOF/F-BC 20% | 0.99580        | 0.01309 ± 0.0004.2494       | 0.9751                             |

Table S 1. Parameters of the fitting of the adsorption process for the materials under investigation.

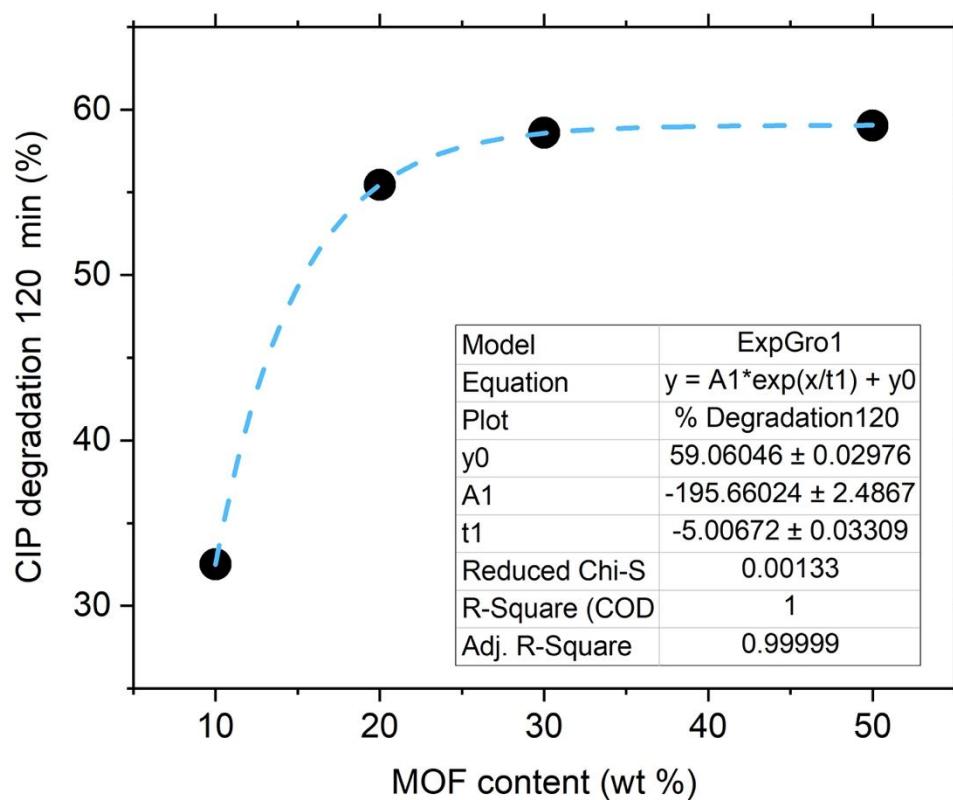

Figure S 3. CIP degradation under simulated solar light catalyzed by the binary composites vs. MOF content. Markers are experimental points; the dashed line is the exponential fit of the data.

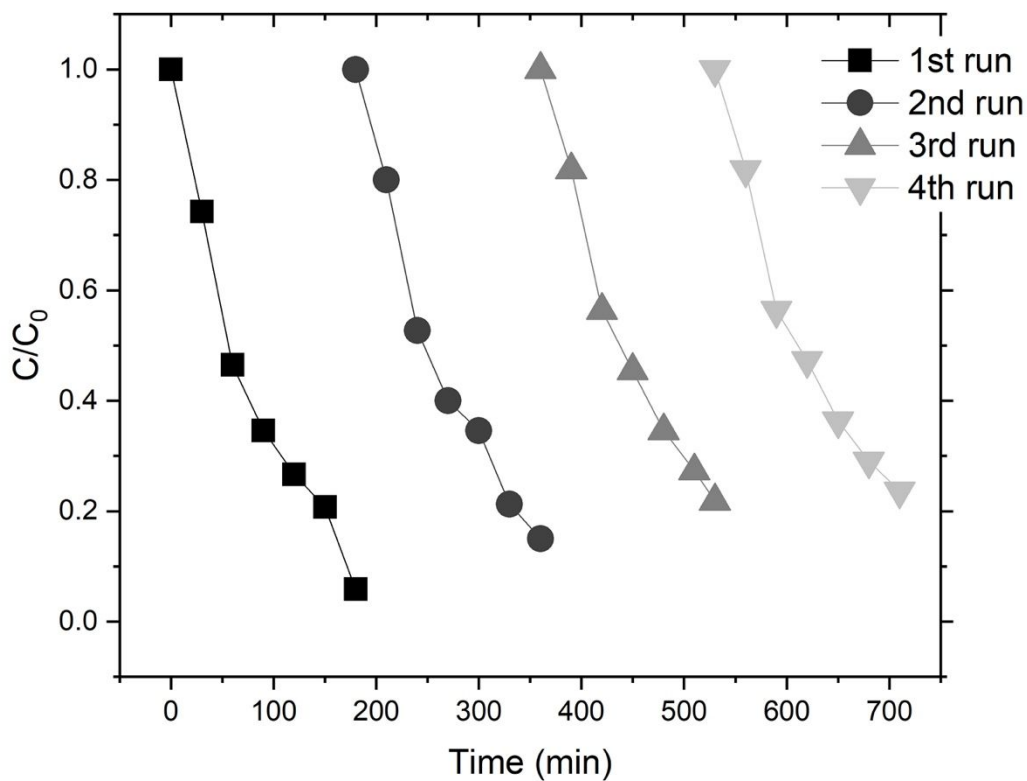

Figure S 4. Recyclability runs for the ternary composite BiOI/MOF/F-BC 10%.

| Material          | $-\ln(C_t/C_0)$ vs. Time |                                    |
|-------------------|--------------------------|------------------------------------|
|                   | Fitting Equations        | R-Square                           |
| MOF               | Sigmoidal                | $R^2 = 0.99947$                    |
| BiOI              | Linear                   | $R^2 = 0.9896$                     |
| BiOI/MOF-30%      | Linear                   | $R^2 = 0.99457$                    |
| BiOI/MOF/F-BC-10% | Linear AND exponential   | $R^2 = 0.99295$<br>$R^2 = 0.99342$ |

Table S 2. Fitting parameters for the reaction course.

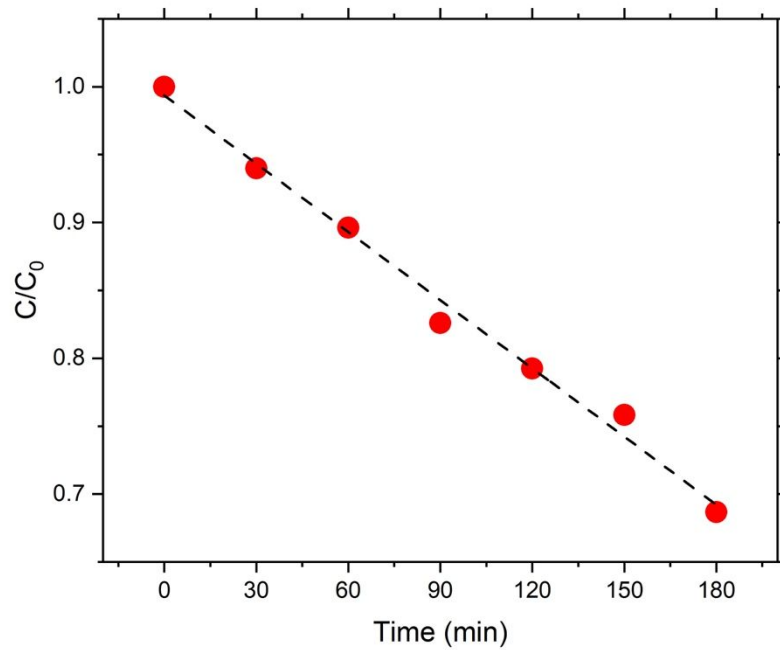

Figure S 5. Fitting of the reaction course for CIP degradation under simulated solar light catalyzed by pure BiOI. Markers are experimental point, line is the linear fitting ( $R^2=0.9912$ ).

| Material          | 2 Theta (°) | Reflection (hkl) | d-spacing (Å) |
|-------------------|-------------|------------------|---------------|
| BiOI              | 8.70        | 001              | 10.1          |
|                   | 29.09       | 102              | 3.06          |
|                   | 31.77       | 110              | 2.81          |
|                   | 45.45       | 200              | 1.99          |
|                   | 55.09       | 212              | 1.66          |
| BiOI/MOF 30%      | 29.35       | 102              | 3.03          |
|                   | 31.91       | 110              | 2.80          |
|                   | 45.73       | 200              | 1.98          |
|                   | 55.35       | 212              | 1.66          |
| BiOI/MOF 50%      | 30.07       | 102              | 2.96          |
|                   | 32.09       | 110              | 2.78          |
|                   | 45.97       | 200              | 1.97          |
|                   | 55.94       | 212              | 1.64          |
| BiOI/MOF/F-BC 10% | 28.98       | 102              | 3.07          |
|                   | 31.81       | 110              | 2.81          |
|                   | 45.60       | 200              | 1.98          |
|                   | 54.88       | 212              | 1.67          |
| BiOI/MOF/F-BC 20% | 28.98       | 102              | 3.07          |
|                   | 31.81       | 110              | 2.81          |
|                   | 45.60       | 200              | 1.98          |
|                   | 54.88       | 212              | 1.67          |

Table S 3. XRD analysis, reporting the observed angles of reflection of different crystalline planes and the calculated interplanar distances (Bragg law was used, so that the interplanar distance is  $d = \frac{n\lambda}{2\sin\theta}$ ).

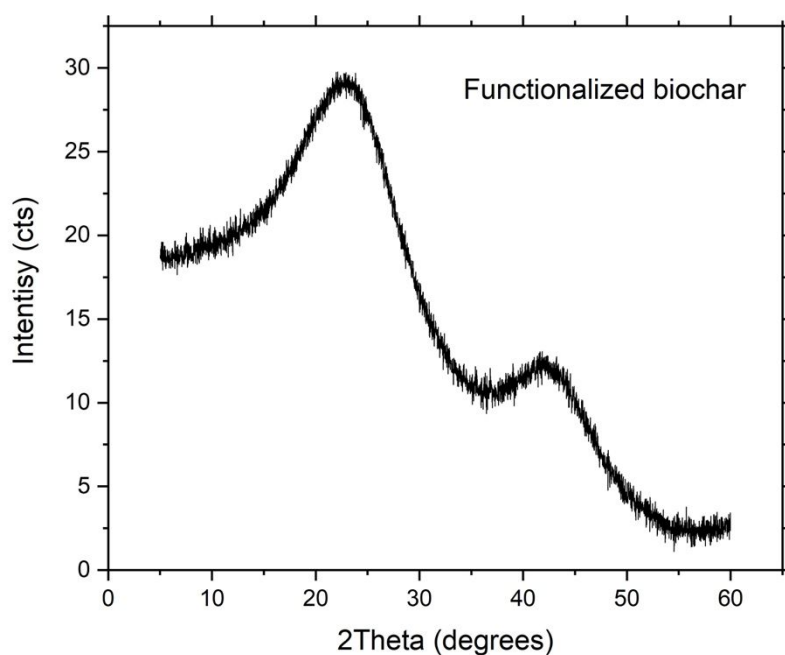

Figure S 6. XRD pattern of the oxidized biochar.

Figure S 7. UV spectrum along with the liquid chromatograms and mass-to-charge ratio spectra of the main photodegradation intermediates of ciprofloxacin generated in the photodegradation reaction catalyzed by the ternary composite (BiOI/MOF/F-BC 10%) at: (a) pH=3, (b) pH=6.2, (c) pH=9, and (d) pH=11.

a) pH=3

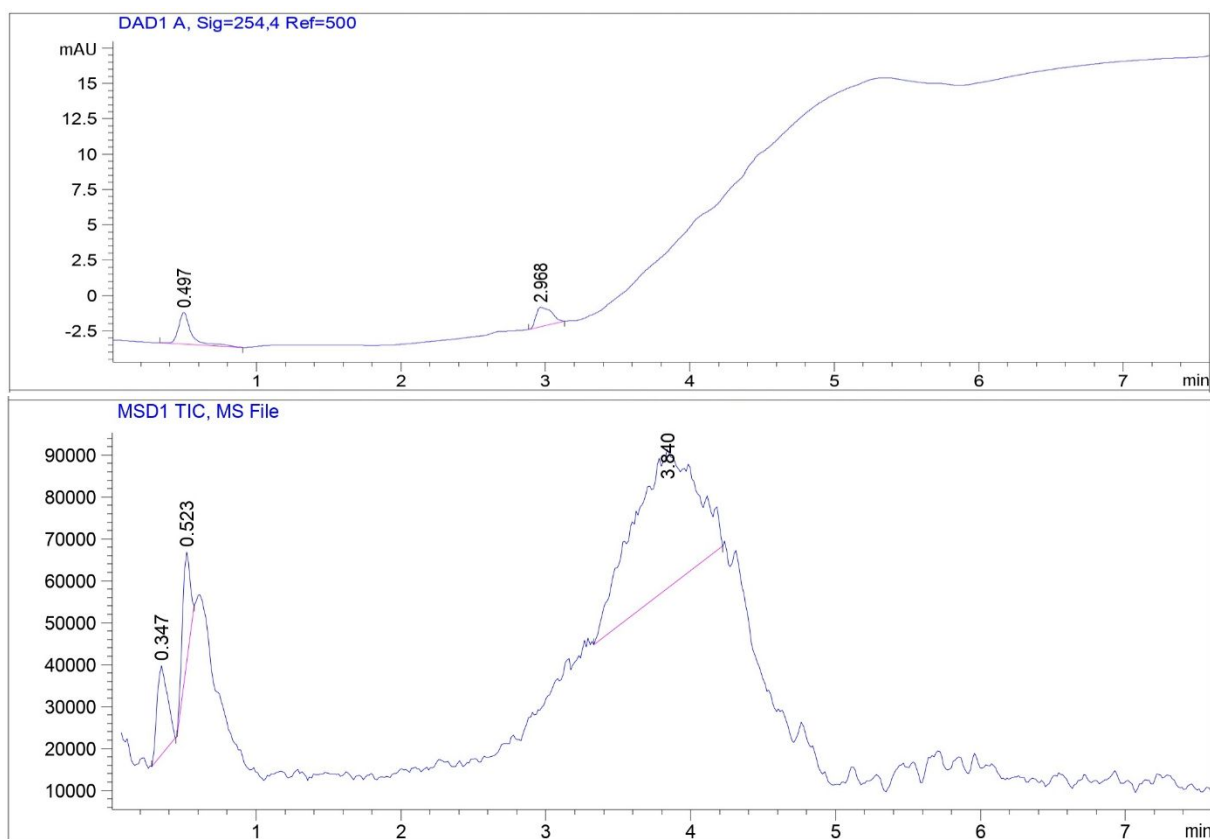



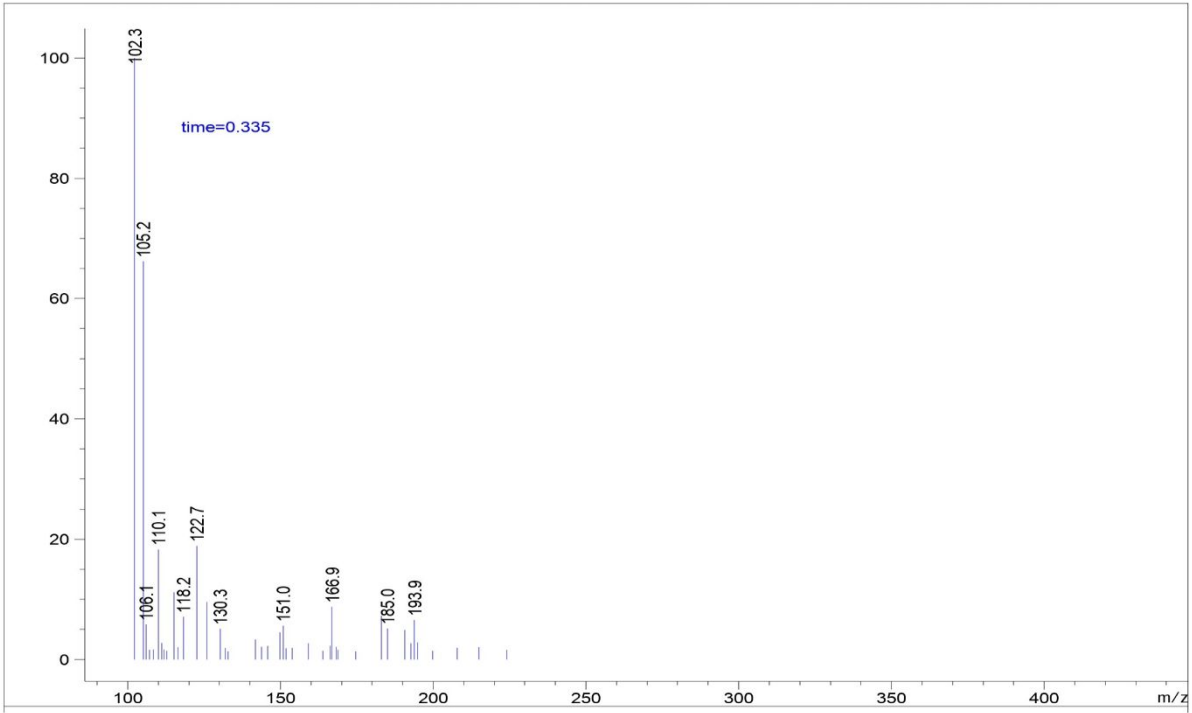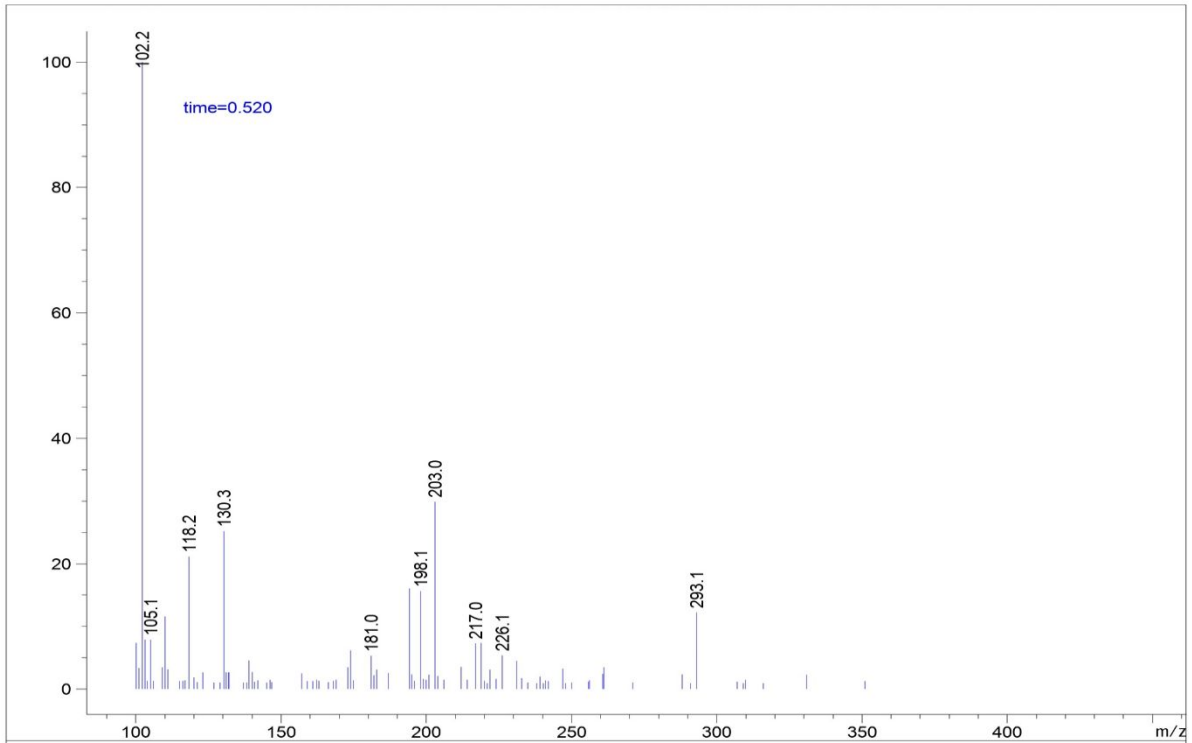

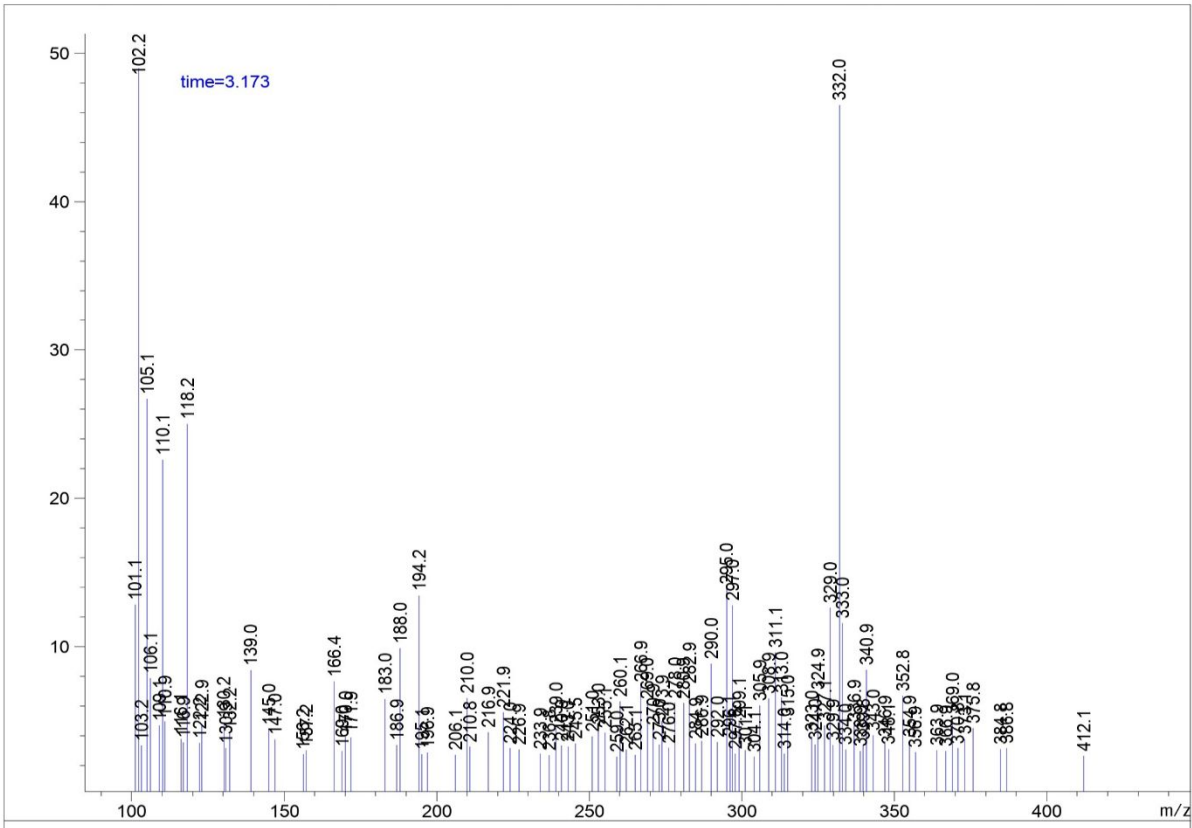

**b) pH=6.2**

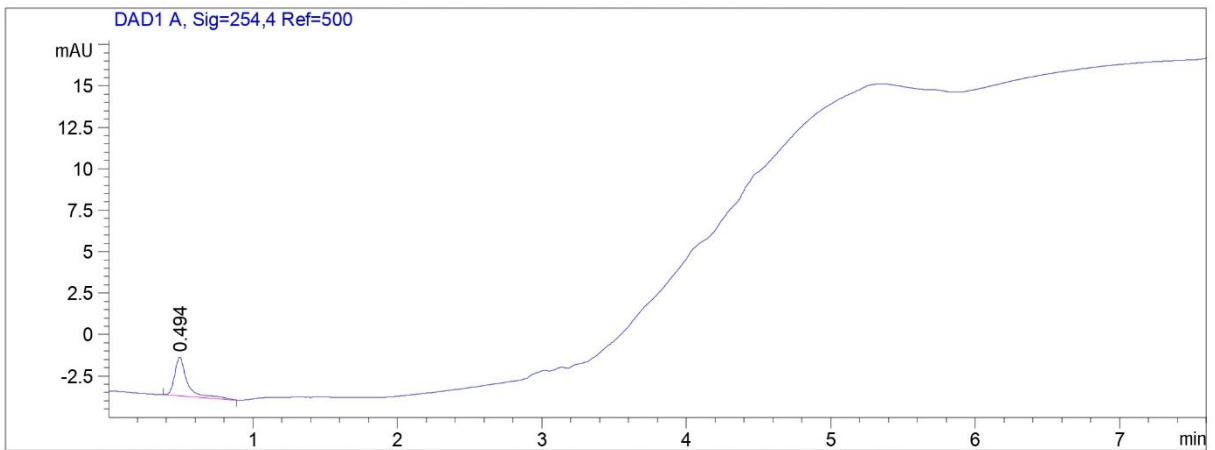

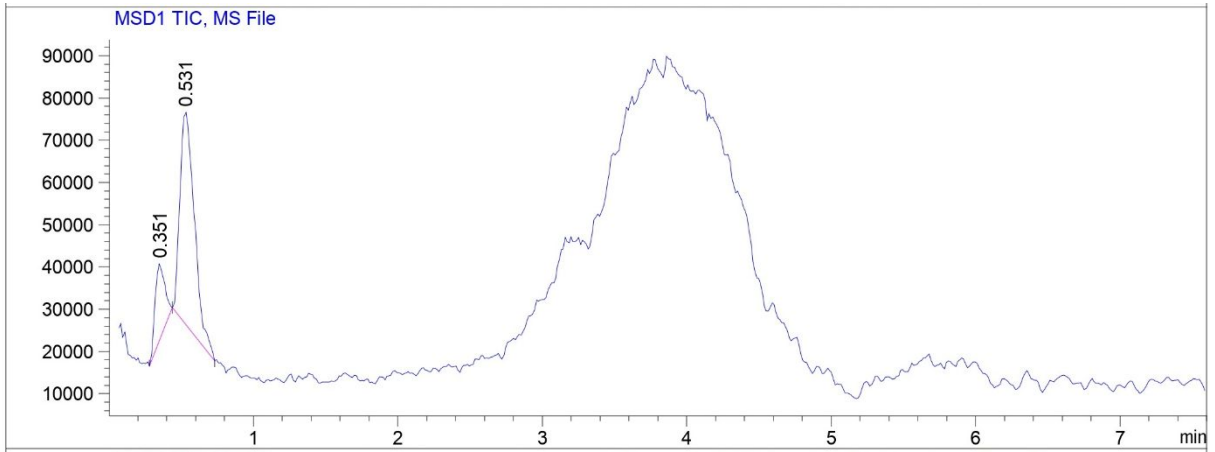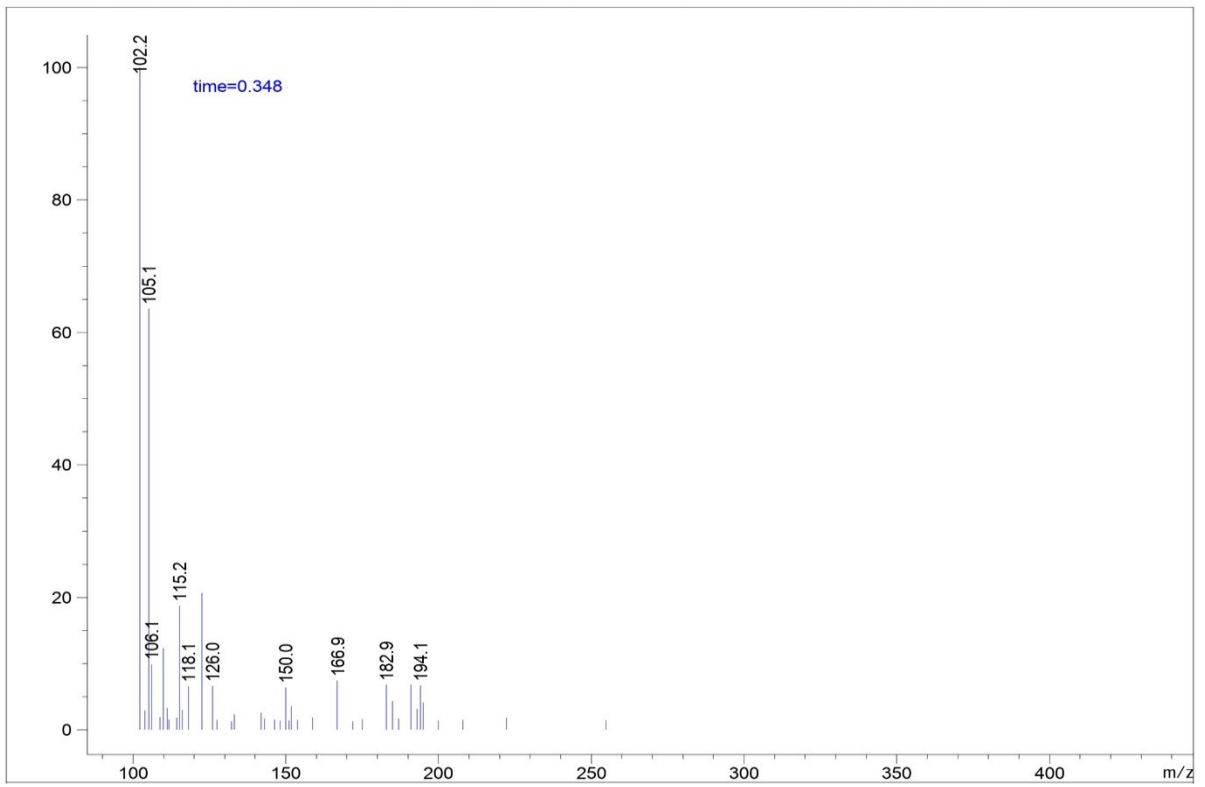

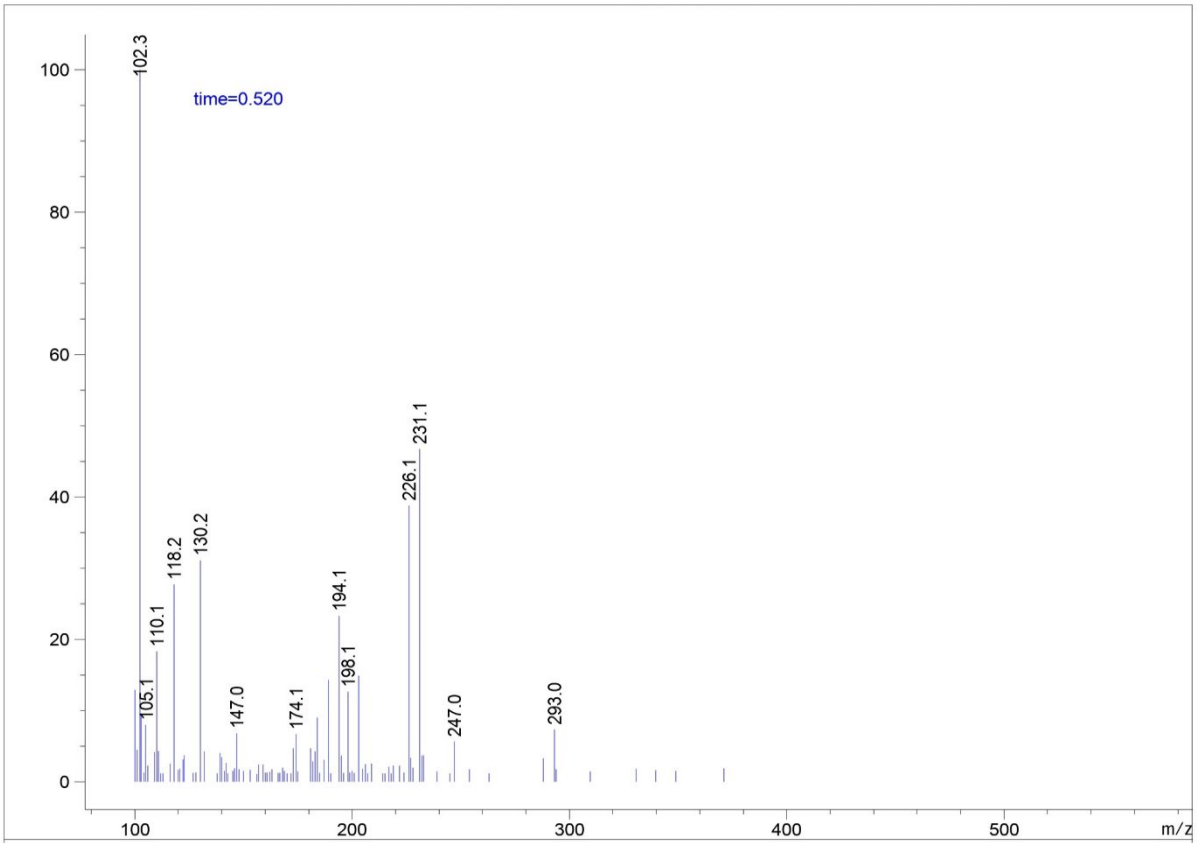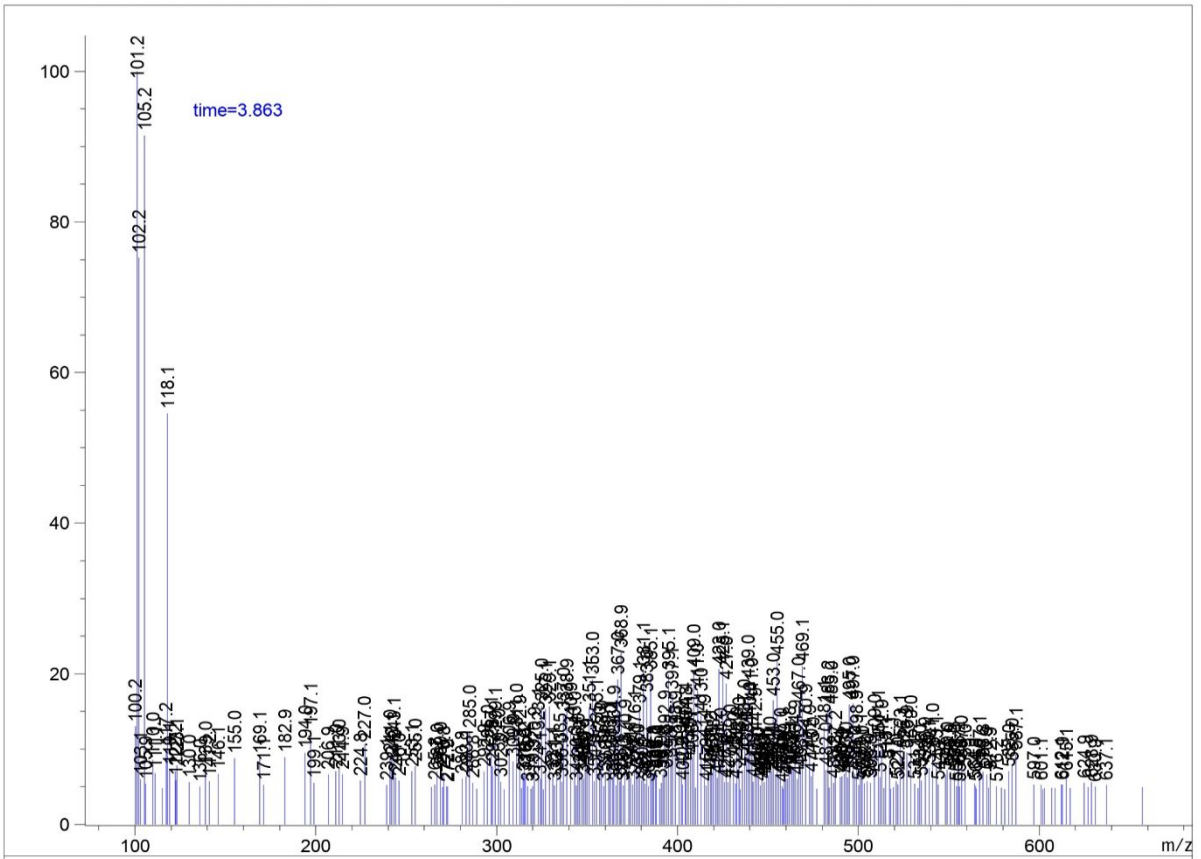

c) pH=9

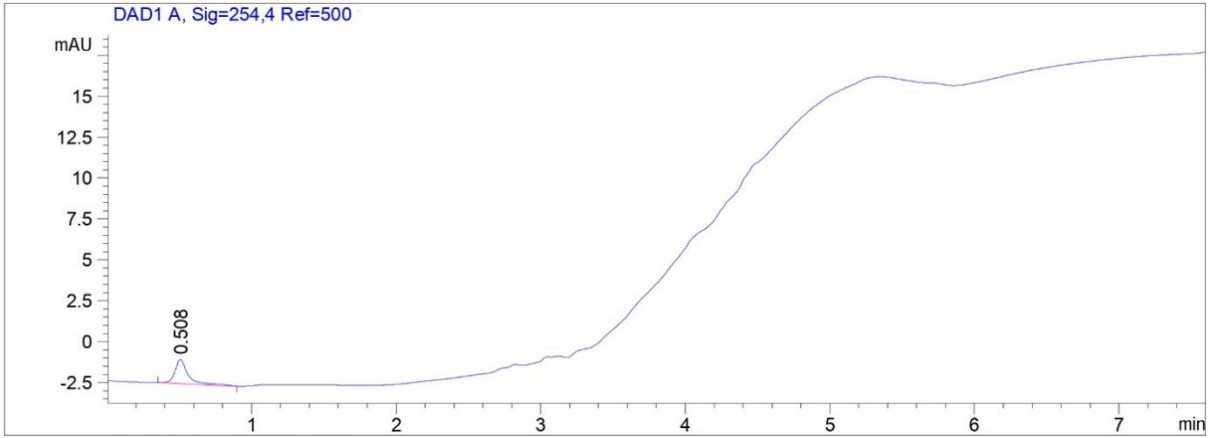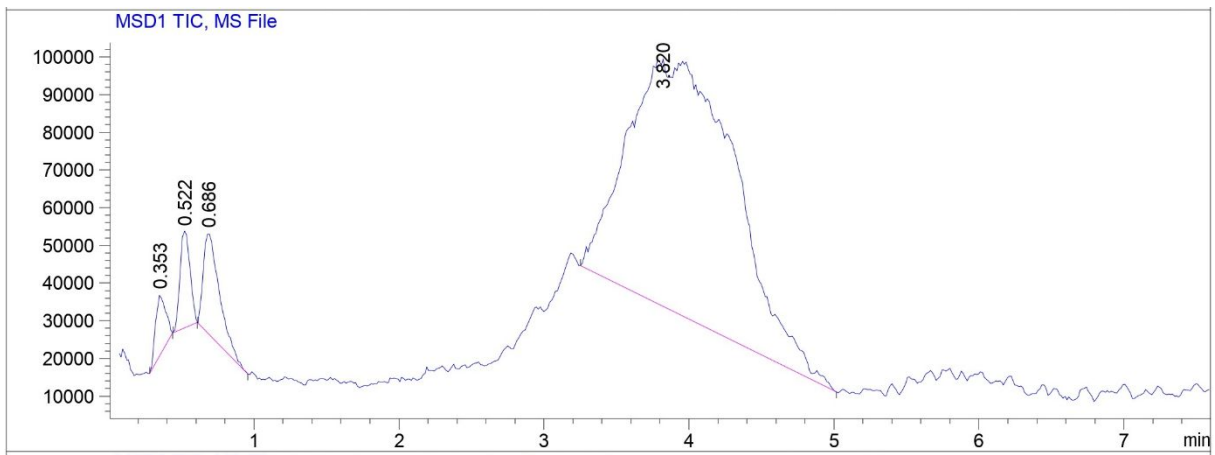

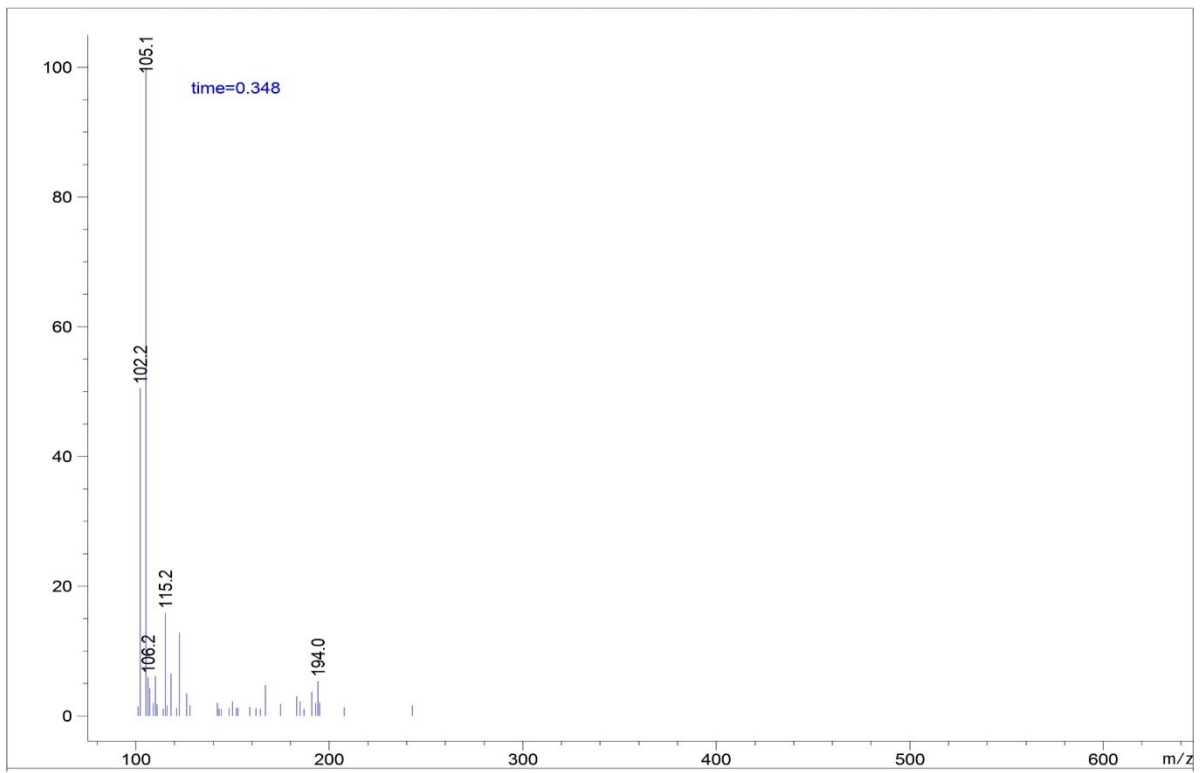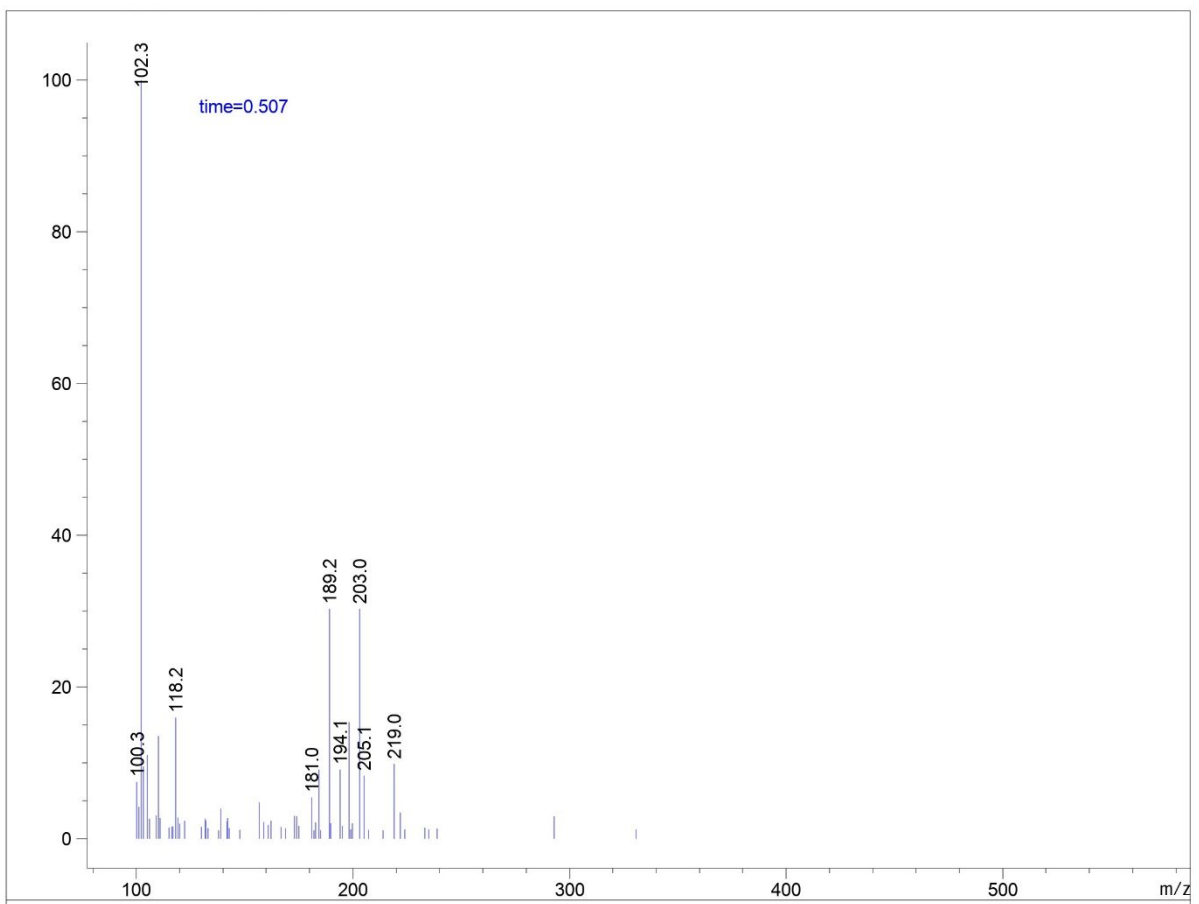

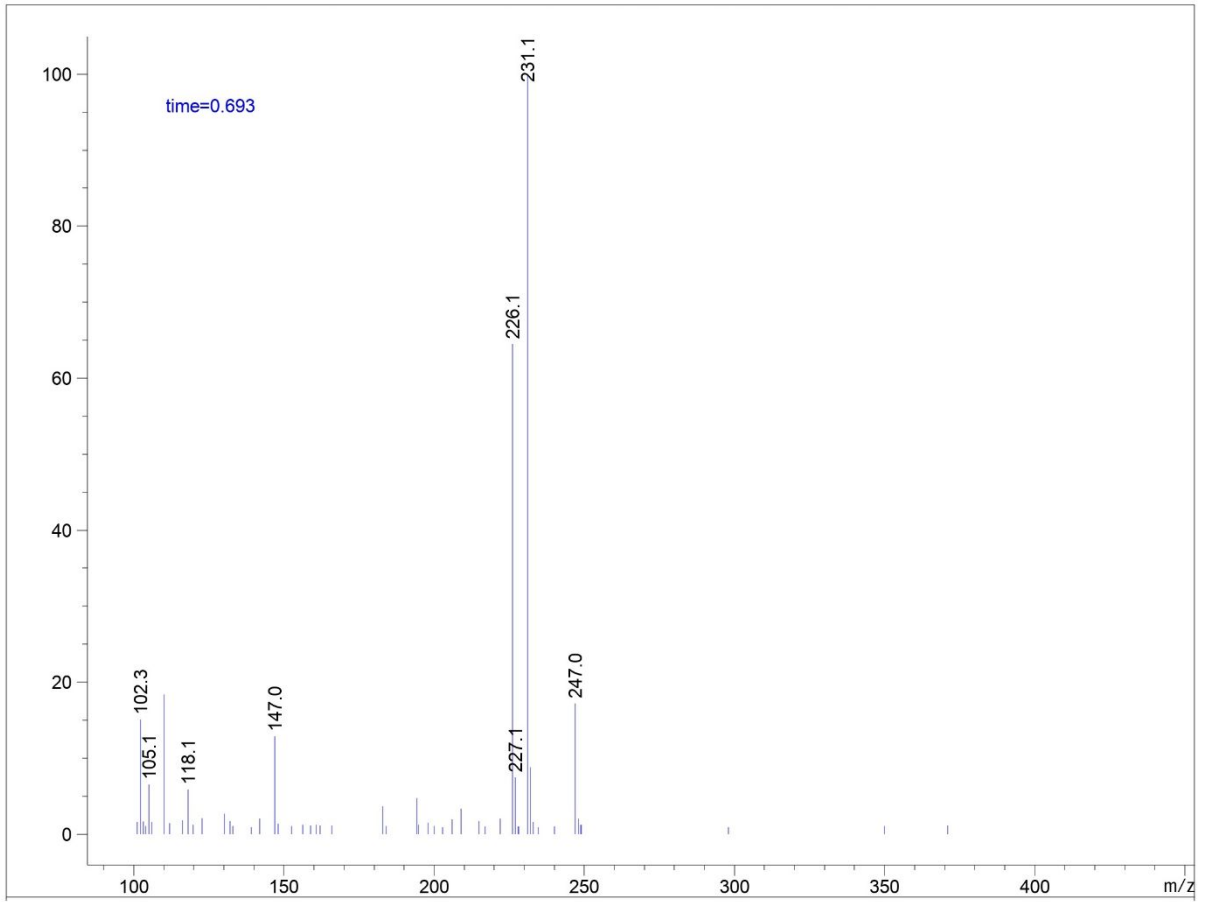

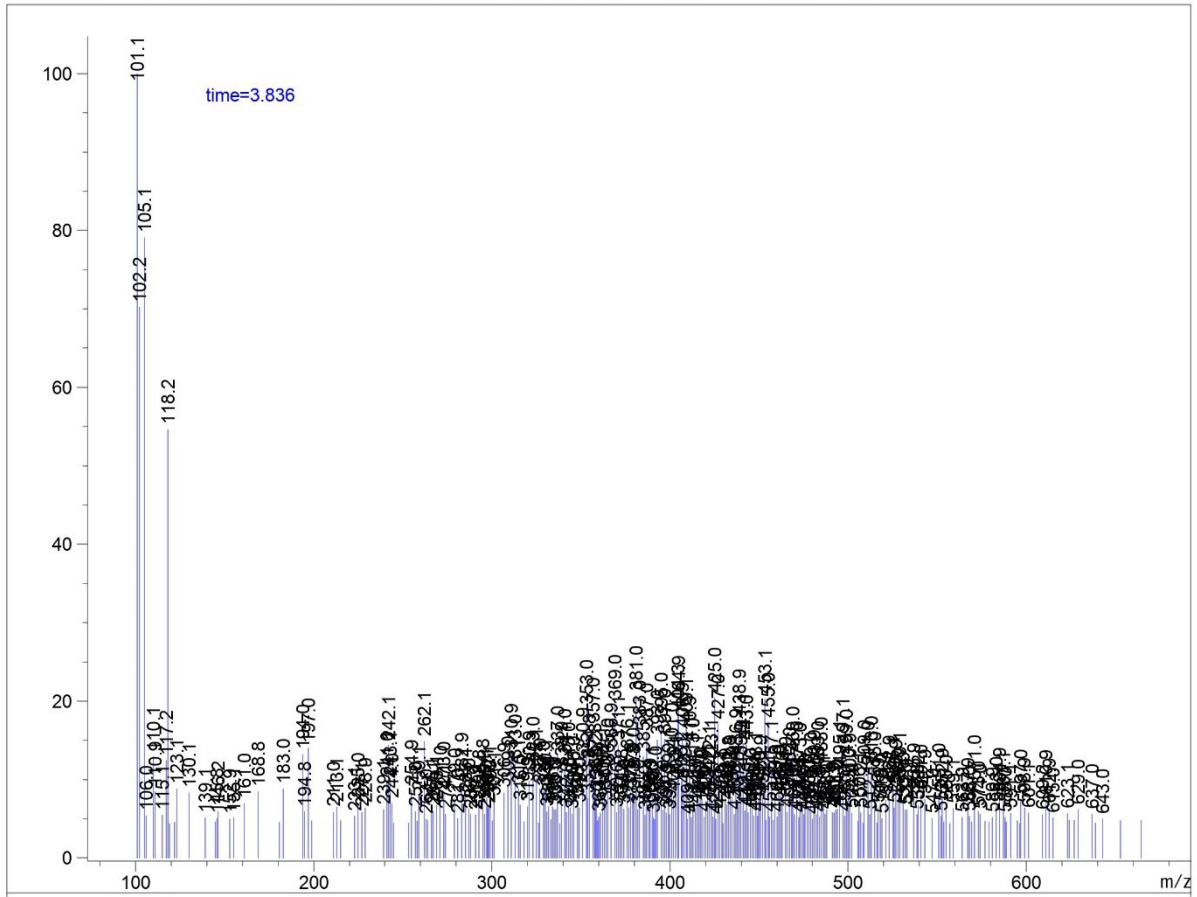

**d) PH=11**

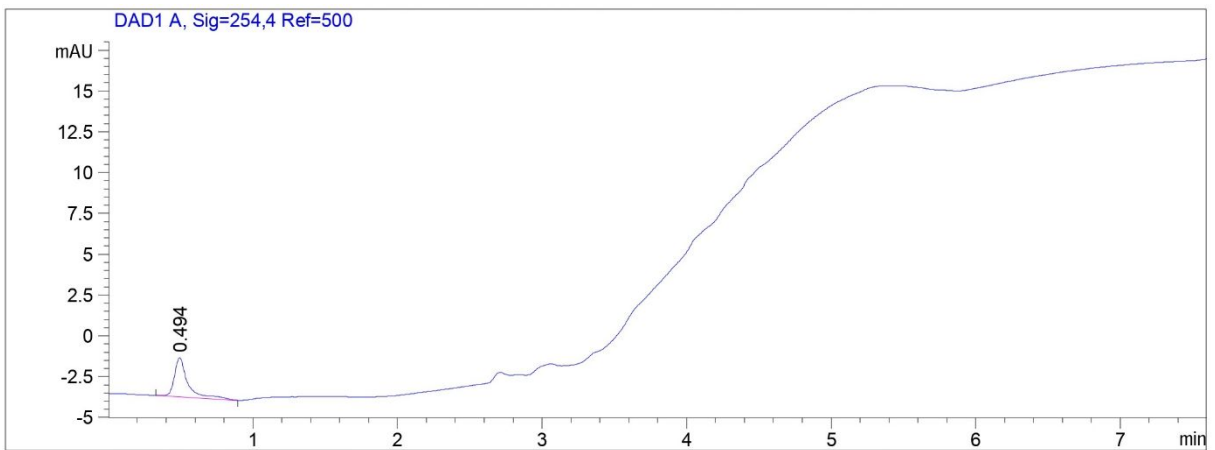



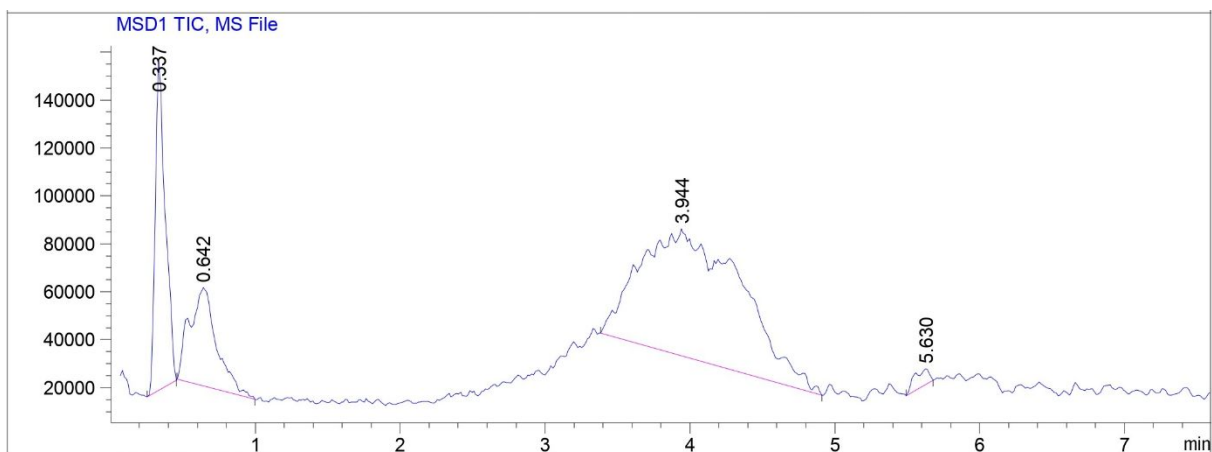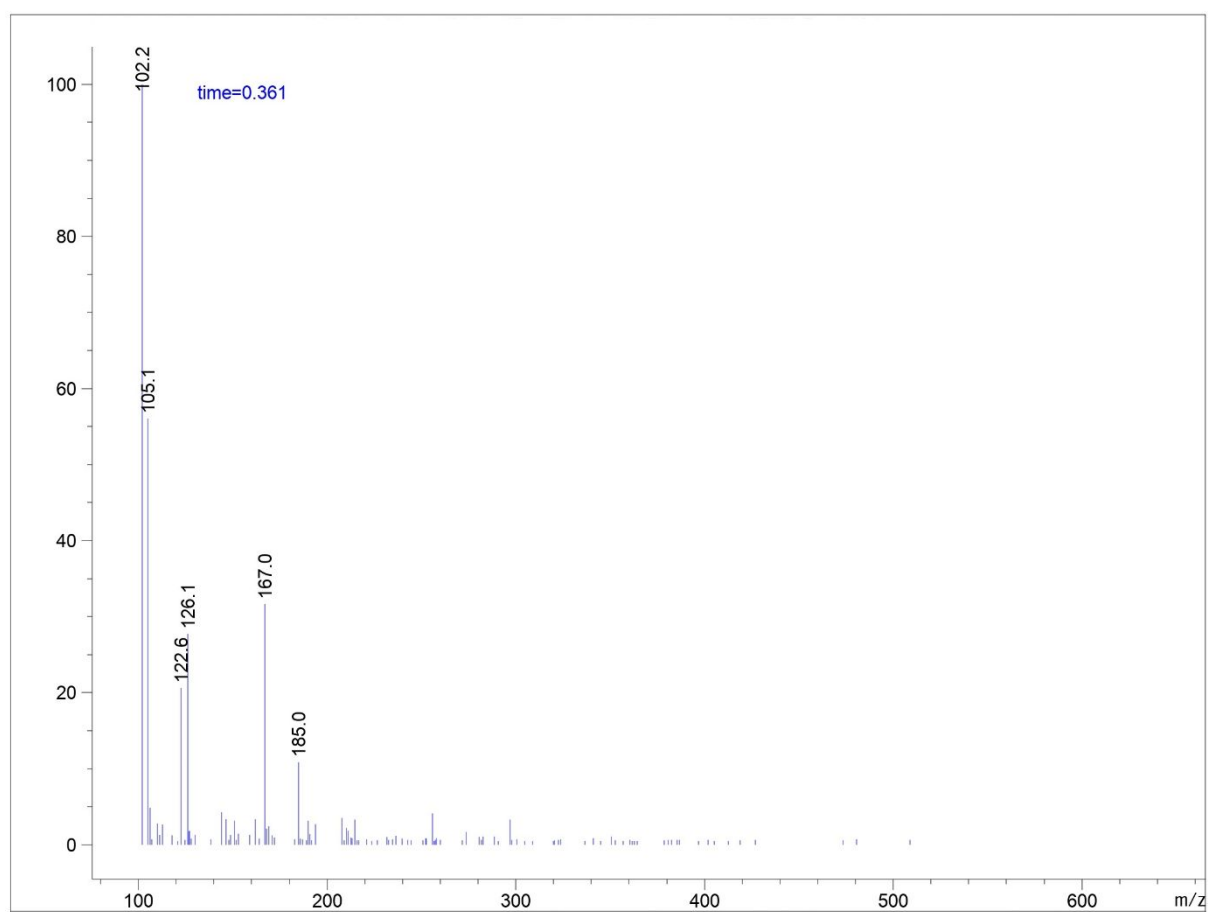

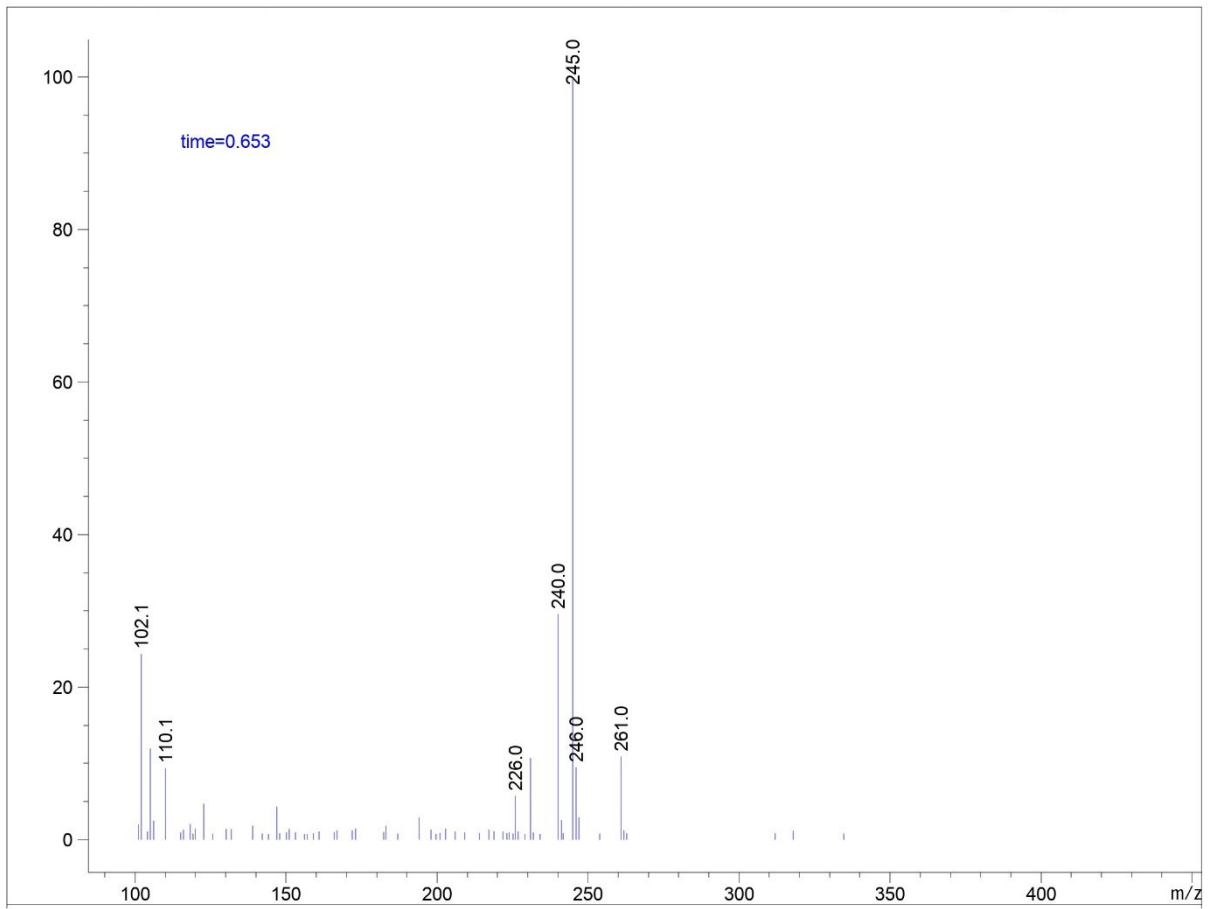

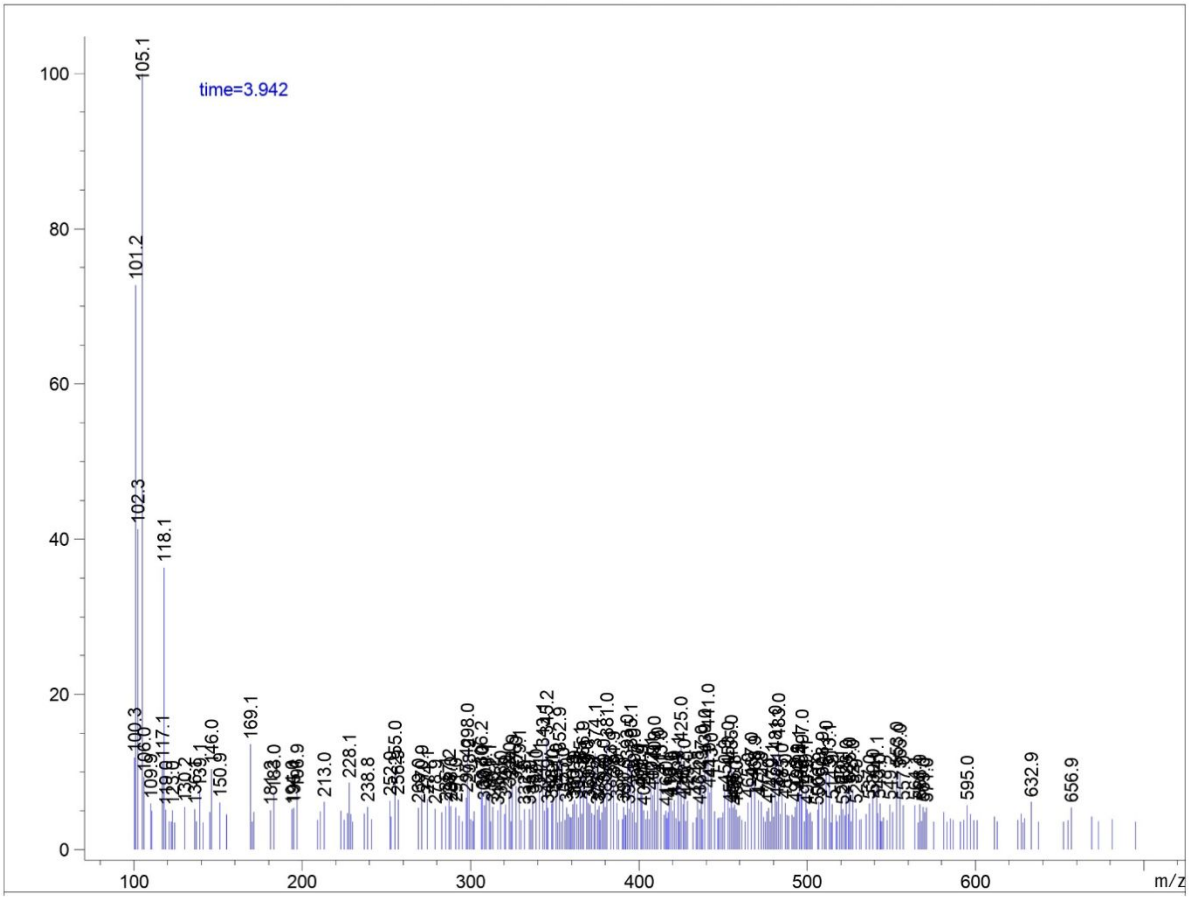

Supplement: ao3c06243_si_001.pdf [file ao3c06243_si_001.pdf]
